# Supplementary material
Source: Springer Nature journal article supplement (https://www.springermedizin.de/resource/supplementary/12937_2010_357_MOESM4_ESM.pdf/25653206)

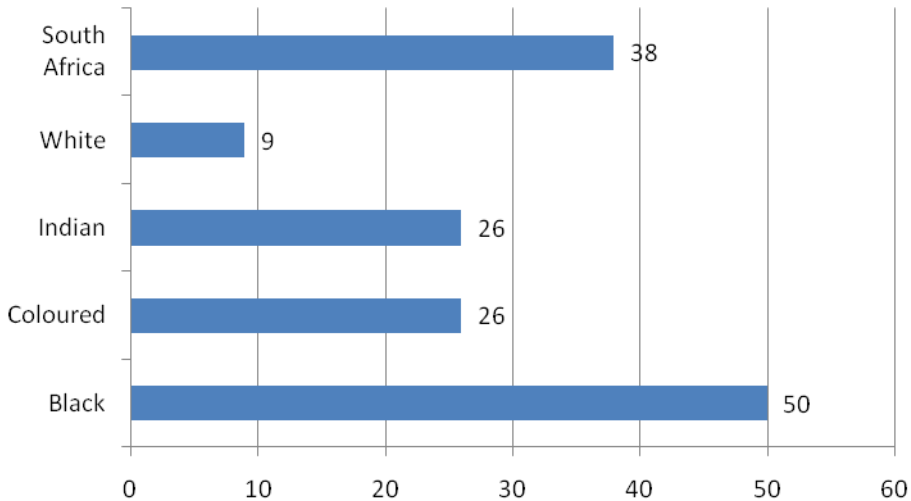

**Percentage of population having a dietary diversity score <4**

Supplement: MOESM4 [file 25653206]
